# Supplementary material for: A radiative transfer module for calculating photolysis rates and solar heating in climate models: Solar-J v7.5
Source: Copernicus journal article supplement (doi:10.5194/gmd-10-2525-2017), 2017-07-03
Supplement: Supplementary file 1 [file gmd-10-2525-2017-supplement.zip]

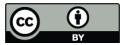

## *Supplement of*

# **A radiative transfer module for calculating photolysis rates and solar heating in climate models: Solar-J v7.5**

**Juno Hsu et al.**

*Correspondence to:* Juno Hsu ([junoh@uci.edu](mailto:junoh@uci.edu))

- [gmd-10-2525-2017-supplement-title-page.pdf](#)
- [GMD\\_SolarJ7.5](#)

### – Data

- \* CTM\_GrdCld.dat
- \* CTM\_GrdCld.dat.old
- \* CTM\_GrdCld\_cirrus.bk
- \* CTM\_GrdCld\_stratus.bk
- \* CTM\_GrdCld\_stratus.dat
- \* FJX\_j2j.dat
- \* FJX\_scat-UMa.dat
- \* FJX\_scat-aer.dat
- \* FJX\_scat-cld.dat
- \* FJX\_scat-ssa.dat
- \* FJX\_spec.dat
- \* atmos\_h2och4.dat
- \* atmos\_std.dat

### – cirrus

- \* SWbgt\_sza0.dat
- \* SWbgt\_sza21.dat
- \* SWbgt\_sza62.dat
- \* SWbgt\_sza84.dat
- \* fj\_sza0.dat
- \* fj\_sza21.dat
- \* fj\_sza62.dat
- \* fj\_sza84.dat
- \* output\_cirrus\_sza0
- \* output\_cirrus\_sza21

- \* output\_cirrus\_sza62
- \* output\_cirrus\_sza84
- \* output\_clearsky\_sza0
- \* output\_clrsky\_sza21
- \* output\_clrsky\_sza62
- \* output\_clrsky\_sza84
- \* sj\_1\_sza0.dat
- \* sj\_1\_sza21.dat
- \* sj\_1\_sza62.dat
- \* sj\_1\_sza84.dat
- \* sj\_2\_sza0.dat
- \* sj\_2\_sza21.dat
- \* sj\_2\_sza62.dat
- \* sj\_2\_sza84.dat
- ffx\_rrtmg\_obj
  - \* cld\_sub\_mod.mod
  - \* cld\_sub\_mod.o
  - \* ffx72.o
  - \* ffx\_cmn\_mod.mod
  - \* ffx\_cmn\_mod.o
  - \* ffx\_init\_mod.mod
  - \* ffx\_init\_mod.o
  - \* ffx\_sub\_mod.mod
  - \* ffx\_sub\_mod.o
  - \* parkind.mod
  - \* parkind.o
  - \* parrsw.mod
  - \* parrsw.o
  - \* rrsd\_con.mod
  - \* rrsd\_con.o
  - \* rrsd\_fastj\_cmn.mod
  - \* rrsd\_fastj\_cmn.o
  - \* rrsd\_kg16.mod
  - \* rrsd\_kg16.o
  - \* rrsd\_kg17.mod
  - \* rrsd\_kg17.o
  - \* rrsd\_kg18.mod
  - \* rrsd\_kg18.o
  - \* rrsd\_kg19.mod
  - \* rrsd\_kg19.o
  - \* rrsd\_kg20.mod
  - \* rrsd\_kg20.o
  - \* rrsd\_kg21.mod
  - \* rrsd\_kg21.o
  - \* rrsd\_kg22.mod
  - \* rrsd\_kg22.o
  - \* rrsd\_kg23.mod

- \* rrs\_w\_kg23.o
- \* rrs\_w\_kg24.mod
- \* rrs\_w\_kg24.o
- \* rrs\_w\_kg25.mod
- \* rrs\_w\_kg25.o
- \* rrs\_w\_kg26.mod
- \* rrs\_w\_kg26.o
- \* rrs\_w\_kg27.mod
- \* rrs\_w\_kg27.o
- \* rrs\_w\_kg28.mod
- \* rrs\_w\_kg28.o
- \* rrs\_w\_kg29.mod
- \* rrs\_w\_kg29.o
- \* rrs\_w\_ref.mod
- \* rrs\_w\_ref.o
- \* rrs\_w\_vsn.mod
- \* rrs\_w\_vsn.o
- \* rrs\_w\_wvn.mod
- \* rrs\_w\_wvn.o
- \* rrtmg\_sw\_init.mod
- \* rrtmg\_sw\_init.o
- \* rrtmg\_sw\_inp.o
- \* rrtmg\_sw\_k\_g.o
- \* rrtmg\_sw\_setcoef.mod
- \* rrtmg\_sw\_setcoef.o
- \* rrtmg\_sw\_taumol.mod
- \* rrtmg\_sw\_taumol.o
- f\_jx\_src
  - \* cld\_sub\_mod.f90
  - \* f\_jx72.f90
  - \* f\_jx\_cm\_n\_mod.f90
  - \* f\_jx\_init\_mod.f90
  - \* f\_jx\_sub\_mod.f90
- makefile
- readme.txt
- rrtmg\_modules
  - \* parkind.f90
  - \* parrsw.f90
  - \* parrsw.o
  - \* parrsw.f90
  - \* rrs\_w\_con.f90
  - \* rrs\_w\_fastj\_cm\_n.f90
  - \* rrs\_w\_kg16.f90
  - \* rrs\_w\_kg17.f90
  - \* rrs\_w\_kg18.f90
  - \* rrs\_w\_kg19.f90
  - \* rrs\_w\_kg20.f90

- \* rrs\_w\_kg21.f90
- \* rrs\_w\_kg22.f90
- \* rrs\_w\_kg23.f90
- \* rrs\_w\_kg24.f90
- \* rrs\_w\_kg25.f90
- \* rrs\_w\_kg26.f90
- \* rrs\_w\_kg27.f90
- \* rrs\_w\_kg28.f90
- \* rrs\_w\_kg29.f90
- \* rrs\_w\_ncpar.f90
- \* rrs\_w\_ref.f90
- \* rrs\_w\_vsn.f90
- \* rrs\_w\_wvn.f90
- rrtmg\_src
  - \* rrtmg\_sw\_init.f90
  - \* rrtmg\_sw\_inp.f90
  - \* rrtmg\_sw\_k\_g.f90
  - \* rrtmg\_sw\_setcoef.f90
  - \* rrtmg\_sw\_taumol.f90
- runscript\_solarj.sh
- solarj
- stratus
  - \* SWbgt\_sza0.dat
  - \* SWbgt\_sza21.dat
  - \* SWbgt\_sza62.dat
  - \* SWbgt\_sza84.dat
  - \* fj\_sza0.dat
  - \* fj\_sza21.dat
  - \* fj\_sza62.dat
  - \* fj\_sza84.dat
  - \* output\_clearsky\_sza0
  - \* output\_clrsky\_sza21
  - \* output\_clrsky\_sza62
  - \* output\_clrsky\_sza84
  - \* output\_stratus\_sza0
  - \* output\_stratus\_sza21
  - \* output\_stratus\_sza62
  - \* output\_stratus\_sza84
  - \* sj\_1\_sza0.dat
  - \* sj\_1\_sza21.dat
  - \* sj\_1\_sza62.dat
  - \* sj\_1\_sza84.dat
  - \* sj\_2\_sza0.dat
  - \* sj\_2\_sza21.dat
  - \* sj\_2\_sza62.dat
  - \* sj\_2\_sza84.dat

The copyright of individual parts of the supplement might differ from the CC BY 3.0 License.
